# Supplementary material for: Synchrotron-Radiation-Based Fourier Transform Infrared Microspectroscopy as a Tool for the Differentiation between Staphylococcal Small Colony Variants
Source: MDPI journal article supplement (doi:10.3390/antibiotics11111607), 2022-11-11
Supplement: s1 [file s1]

## Supplementary Materials

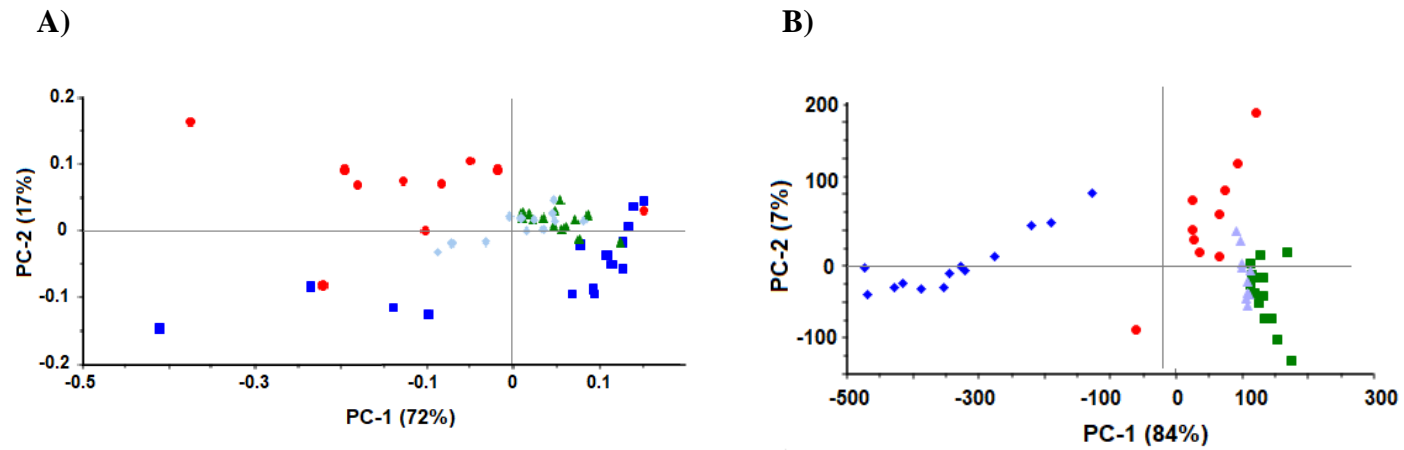

**Figure S1:** PCA-score plot of lipids (A) and (B) protein-carbonyl regions in *S. aureus* wild type (navy), natural SCV (green), *hemB* mutant (light blue) and complemented mutant (red).

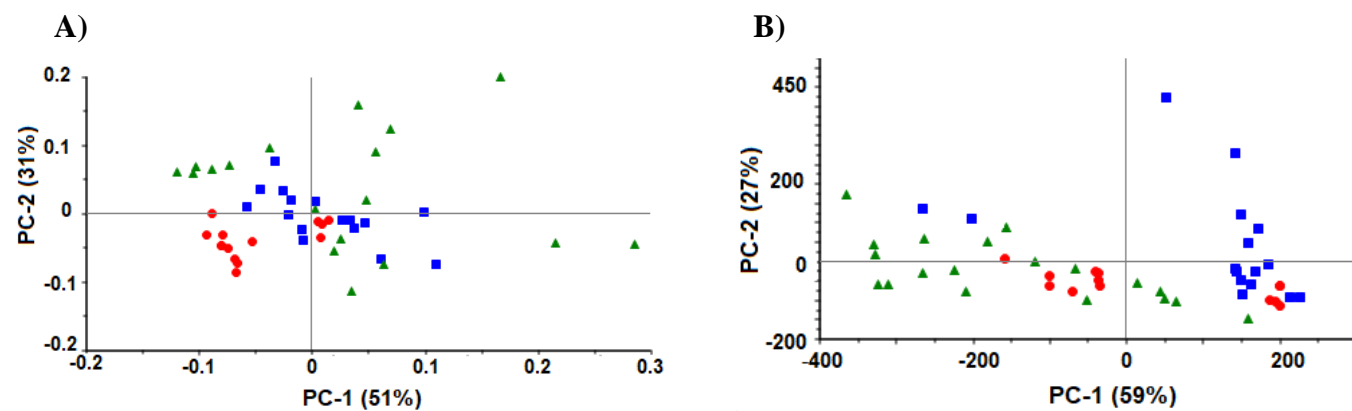

**Figure S2:** PCA-score plots of lipids (A) and protein-carbonyl (B) regions, respectively, of *S. epidermidis* SCV clinical isolates obtained from three different patients; red, green and blue (LSCV, NSCV and ASCV, respectively)

**Table S1.** Biochemical and other characteristics of DFU SCV strains

| Sample ID                          | Growth nutrient agar | Growth Colombia agar | Subculture on Colombia agar for at least 15 times | Gram stain | Catalase | Coagulase | Hemolysis | RapID One System Species          | MALDI* (Best Score Value) |
|------------------------------------|----------------------|----------------------|---------------------------------------------------|------------|----------|-----------|-----------|-----------------------------------|---------------------------|
| <b>NSCV (DFU clinical isolate)</b> | SCV                  | SCV                  | SCV                                               | Positive   | Positive | Negative  | Gamma     | <i>Staphylococcus epidermidis</i> | 1.93                      |
| <b>ASCV (DFU clinical isolate)</b> | SCV                  | 2 types              | Converted after 7th culture                       | Positive   | Positive | Negative  | Gamma     | <i>Staphylococcus epidermidis</i> | 2.03                      |
| <b>LSCV (DFU clinical isolate)</b> | SCV                  | SCV                  | SCV                                               | Positive   | Positive | Negative  | Gamma     | <i>Staphylococcus epidermidis</i> | 1.97                      |

\*Meaning of score values: 2-3; high confidence identification, 1.7-1.99; low confidence identification, 0-1.69; No organism identification was possible.
